# Supplementary material for: Perceptions and engagement of patients with chronic conditions on the use of medical cannabis: a scoping review
Source: Eur J Med Res. 2024 Apr 1;29:211. doi: 10.1186/s40001-024-01803-w (PMC10983766; doi:10.1186/s40001-024-01803-w)
Supplement: Supplementary file 2 — Additional file 2: Extraction grid. [file 40001_2024_1803_MOESM2_ESM.xlsx]

## Sheet: Feuille 1
	Identification															Reasons			Beliefs		Effects on self		Discussion with others
#	1st Author	Year	Title	Journal	Country	Chronic Disease	Aims	Methods	Number of Participants	Age	Ethnicity	Sex	Cannabis legislation	Patient Engagement	Conflict of interests	Reasons to use	Reasons to stop using	Reasons not to use/Barriers	Beliefs on cannabis	Knowledge on cannabis	Perceived Effects on Self	Empowerment	Discussion with HCP	Discussion with relatives
1	Belyea	2016	Marijuana Use Among Patients With Glaucoma in a City With Legalized Medical Marijuana Use	JAMA Ophthalmology	United States	Glaucoma	Identify factors among patients with glaucoma that could lead to intentions to use marijuana for treatment.	Questionnaire/ Survey	204	Yes - Not significantly associated with intention to use	Yes - Not significantly associated with intention to use	Yes - Contextual only	Yes - Positively associated with intention to use	No	No	Symptoms improvements	Not reported	Access difficulties	Comparison with other medications Concerns and risk perception General support / Comfort level of using medical cannabis	Knowledge on cannabis in general Knowledge of the effects of cannabis Search for information on cannabis	Not reported	Not reported	Relationship with healthcare provider	Advice received or given Cannabis use by a relative
2	Benson	2020	Medicinal cannabis for inflammatory bowel disease: A survey of perspectives, experiences, and current use in australian patients	Crohn's and Colitis 360	Australia	Inflammatory bowel disease	Examine attitudes and experiences with MC in relation to IBD management	Questionnaire/ Survey	838	Yes. Contextual only	Yes. Contextual only	Yes. Compared users/non users	Yes - Attitudes and cessation of MC use	No	Yes	Not reported	Advice from relative/healthcare provider Access difficulties Concerns	Advice from relative/healthcare provider Access difficulties Concerns	Concerns and risk perception General support / Comfort level of using medical cannabis	Search for information on cannabis	Effect on quality of life Effect on symptoms New side effects	Not reported	Not reported	Not reported
3	Bianconi	2016	Differences in cannabis-related experiences between patients with a first episode of psychosis and controls	Psychological medicine	United Kingdoms	First episode of psychosis	Explore differences in self-reported cannabis experiences between FEP and non-psychotic populations	Questionnaire/ Survey	469	Yes. Contextual only	Yes. Contextual only	Yes. Contextual only	No	No	No	Not reported	Not reported	Not reported	Concerns and risk perception	Not reported	New side effects	Decison-making on own treatment	Not reported	Not reported
4	Bobitt	2020	Use of cannabis and opioids for chronic pain by older adults: Distinguishing clinical and contextual influences	Drug and alcohol review	United States	Chronic pain	Examine how medical needs and other variables associated with a persons’ background and attitudes influence choices concerning the use of opioids and cannabis to treat pain (logistic regression models to determine predictor of cannabis use)	Questionnaire/ Survey	436	Yes - association with MC use	Yes - Contextual only	Yes - Considered as a predisposing factor to cannabis use	No	Consultation (identify themes)	No	Not reported	Not reported	Not reported	General support / Comfort level of using medical cannabis Stereotypes	Not reported	Effect on symptoms	Not reported	Perceived attitude of healthcare provider Whether they have discussed it	Not reported
5	Boehnke	2021	Cannabidiol Use for Fibromyalgia: Prevalence of Use and Perceptions of Effectiveness in a Large Online Survey	Journal of Pain	United States	Fibromyalgia	Better understand rates of CBD use, reasons for use and discontinuation, communication with healthcare professionals about CBD, and perceptions of CBD effectiveness and safety among people with FM	Questionnaire/ Survey	2701	Yes - association with MC use	Yes - association with MC use	Yes - association with MC use	Yes - rational for MC usage	No	Yes	Discussion and information found Symptoms improvements In relation to other medications	Advice from relative/healthcare provider Side effects Ineffectiveness / Loss of interest Concerns Access difficulties	Personal choice Advice from relative/healthcare provider Access difficulties Concerns Information and research missing	Not reported	Not reported	Effect on quality of life Effect on symptoms New side effects	Not reported	Perceived attitude of healthcare provider Discussion characteristics of MC with healthcare provider Whether they have discussed it	Concerns about- or lived- stigma
6	Bourke	2019	Using cannabis for pain management after spinal cord injury: a qualitative study	Spinal Cord Series and Cases	New Zeland	Spinal Cord Injury (Pain)	Explore why individuals with spinal cord injury (SCI) choose to use cannabis to manage their pain and their experiences in doing so	Interviews	8	Yes - Contextual only	Yes - Contextual only	Yes - Contextual only	Yes - for perception and interaction with HCP	No	No	Discussion and information found In relation to other medications	Not reported	Access difficulties	Concerns and risk perception General support / Comfort level of using medical cannabis	Knowledge on cannabis in general Knowledge of the effects of cannabis Search for information on cannabis	Effect on quality of life Effect on symptoms Effects comparison with other medications Impact on lifestyle habits	Decison-making on own treatment Positive feeling	Perceived attitude of healthcare provider Relationship with healthcare provider	Level of support received
7	Bruce	2018	Preferences for medical marijuana over prescription medications among persons living with chronic conditions: Alternative, complementary, and tapering uses	Journal of Alternative and Complementary Medicine	United States	Chronic conditions	Describe approaches to use of MC vis-à-vis prescription medications in the treatment of selected chronic conditions	Interviews	30	Yes - Contextual only	Yes - Contextual only	Yes - contextual only	No	No	No	Symptoms improvements In relation to other medications	Not reported	Not reported	Concerns and risk perception	Not reported	Effects comparison with other medications	Decison-making on own treatment	Not reported	Not reported
8	Buadze	2010	Do patients think cannabis causes schizophrenia? A qualitative study on the causal beliefs of cannabis using patients with schizophrenia	Harm Reduction Journal	Switzerland	Schizophrenia	Elucidate whether patients with schizophrenia who use cannabis believe that its use has caused their schizophrenia and to explore these patients other beliefs and perceptions about the effects of the drug	Interviews	10	Yes - Contextual only	Yes - Contextual only	Yes - contextual only	No	No	No	Symptoms improvements Improve quality of life	Not reported	Not reported	Concerns and risk perception	Knowledge of the effects of cannabis	Effect on quality of life Effect on symptoms New side effects	Decison-making on own treatment	Not reported	Not reported
9	Butler	2021	Cannabidiol knowledge, beliefs, and experiences of patients with cancer	Clinical Journal of Oncology Nursing	United States	Cancer	Explore patients’ knowledge of and experience with CBD.	Questionnaire/ Survey	100	Yes - contextual only	Yes - Contextual only	Yes - contextual only	No	Consultation (pilot test)	No	Symptoms improvements	Advice from relative/healthcare provider Access difficulties Ineffectiveness / Loss of interest	Advice from relative/healthcare provider Information and research missing	Concerns and risk perception General support / Comfort level of using medical cannabis	Knowledge on cannabis in general Search for information on cannabis	Effect on symptoms New side effects	Not reported	Discussion characteristics of MC with healthcare provider Whether they have discussed it	Advice received or given
10	Contentti	2021	Use of cannabis in patients with multiple sclerosis from Argentina	Multiple Sclerosis and Related Disorders	Argentina	Multiple sclerosis	Assess the use of cannabis in patients with MS (PwMS) from Argentina, its reasons and patients’ perceptions on the management of MS symptoms	Questionnaire/ Survey	281					No	No	Symptoms improvements Improve quality of life In relation to the disease	Not reported	Not reported	Not reported	Not reported	New side effects	Not reported	Whether they have discussed it Relationship with healthcare provider	Not reported
11	Costiniuk	2019	Cannabis Consumption in People Living with HIV: Reasons for Use, Secondary Effects, and Opportunities for Health Education	Cannabis and Cannabinoid Research	Canada	HIV	Gain a better understanding of the current reasons for cannabis use among our clinical population of PLWH	Questionnaire/ Survey	104					No	Yes	Symptoms improvements Improve quality of life	Not reported	Not reported	Not reported	Search for information on cannabis	Effect on symptoms New side effects	Not reported	Relationship with healthcare provider	Not reported
12	Francoeur	2010	Attraction to Cannabis Among Men With Schizophrenia: A Phenomenological Study	Canadian Journal of Nursing Research	Canada	Schizophrenia	Describe the perceptions of persons with schizophrenia regarding their attraction to cannabis	Interviews	8					No	No	Not reported	Not reported	Not reported	Expected effects	Not reported	Effect on symptoms Effect on quality of life Self-image	Not reported	Not reported	Comfort level discussing it with relatives Level of support received
13	Friedberg	2016	Medical cannabis: Four patient perspectives	Journal of Pain Management	Canada	PTSD and Pulmonary fibrosis	Provides the perspectives of four patients with very different clinical backgrounds and their reported experiences using medical cannabis	Interviews?	4					No	Yes	Not reported	Ineffectiveness / Loss of interest	Not reported	Not reported	Not reported	Effect on quality of life Effect on symptoms New side effects	Decison-making on own treatment	Whether they have discussed it	Not reported
14	Hawley	2019	Cannabis use in cancer: A survey of the current state at BC cancer before recreational legalization in Canada	Current Oncology	Canada	Cancer	Capture the prevalence of cannabis use among cancer patients at BC Cancer before recreational legalization in Canada and to identify the reasons that patients take cannabis, the various routes of administration they use, and the reasons that prior users stopped	Questionnaire/ Survey	821					Consultation (reviewed questionnaire)	No	Symptoms improvements Improve quality of life In relation to the disease	Advice from relative/healthcare provider Access difficulties Side effects Ineffectiveness / Loss of interest Concerns	Not reported	Not reported	Not reported	Not reported	Not reported	Discussion characteristics of MC with healthcare provider	Not reported
15	Krediet	2020	Experiences with medical cannabis in the treatment of veterans with PTSD: Results from a focus group discussion	Journal of the European College of Neuropsycho pharmacology	Netherlands	PTSD	Learn more about patients’ opinions on and experiences with medical cannabis	Focus group	7					No	No	In relation to other medications	Not reported	Not reported	General support / Comfort level of using medical cannabis Concerns and risk perception Comparison with other medications Stereotypes	Knowledge on cannabis in general	Effect on quality of life New side effects Effect on symptoms	Decison-making on own treatment	Perceived attitude of healthcare provider	Comfort level discussing it with relatives Concerns about- or lived- stigma Cannabis use by a relative
16	Luckett	2016	Clinical trials of medicinal cannabis for appetite-related symptoms from advanced cancer: a survey of preferences, attitudes and beliefs among patients willing to consider participation	Internal Medicine Journal	Australia	Cancer	Explore the preferences, attitudes and beliefs about about previous medicinal cannabis use and preferences for delivery route, and invited comments and concerns of patients eligible and willing to consider participation in a clinical trial of medicinal cannabis for poor appetite and appetite-related symptoms from advanced cancer	Questionnaire/ Survey	204					Consultation (reviewed questionnaire)	No	Symptoms improvements	Not reported	Access difficulties	Concerns and risk perception General support / Comfort level of using medical cannabis Comparison with other medications	Search for information on cannabis	Not reported	Not reported	Not reported	Not reported
17	Manning	2021	Medical Cannabis Use: Exploring the Perceptions and Experiences of Older Adults with Chronic Conditions	Clinical gerontologist	United States	Chronic conditions	Investigate older adults’ perceptions and experiences of medical cannabis use to treat and/or manage chronic conditions, specifically as a substitute for prescription drugs	Interviews	10					No	No	Symptoms improvements Ease of access Discussion and information found In relation to other medications	Ineffectiveness / Loss of interest	Access difficulties	General support / Comfort level of using medical cannabis Concerns and risk perception Médias et compagnie pharmaceutique	Not reported	Not reported	Not reported	Whether they have discussed it Relationship with healthcare provider	Advice received or given Concerns about- or lived- stigma Level of support received
18	Melinsyshyn	2021	Cannabinoid Use in a Tertiary Headache Clinic: A Cross-Sectional Survey	The Canadian Journal of Neurological Sciences	Canada	Headaches	Determine the prevalence and nature of cannabis use in patients with headache in a tertiary headache clinic and to explore patients’ empiric experience in using cannabinoids therapeutically	Questionnaire/ Survey	200					No	No	Not reported	Not reported	Access difficulties	Concerns and risk perception	Knowledge of the effects of cannabis	Effect on symptoms New side effects	Not reported	Not reported	Advice received or given
19	Merker	2018	Legalization of medicinal Marijuana Has Minimal impact on use patterns in patients with inflammatory bowel disease	Inflammatory Bowel Diseases	United States	Inflammatory bowel disease	Investigate patterns in marijuana use since legalization of medicinal marijuana in Massachusetts to understand its potential impact on use in the IBD population	Questionnaire/ Survey	302					No	No	Symptoms improvements	Not reported	Access difficulties	General support / Comfort level of using medical cannabis	Not reported	Effect on symptoms	Not reported	Not reported	Not reported
20	Mousa	2019	Prevalence and predictors of cannabis use among men receiving androgen-deprivation therapy for advanced prostate cancer	Canadian Urological Association Journal	Canada	Cancer	Understand the prevalence, predictors, and perceived benefits of cannabis use among patients with prostate cancer	Questionnaire/ + Urine sample analysis Survey	56					No	No	Symptoms improvements	Not reported	Not reported	Not reported	Knowledge of the effects of cannabis	Effect on symptoms New side effects	Not reported	Not reported	Not reported
21	Neufeld	2021	Cannabis use of patients with inflammatory bowel disease in Germany: a cross-sectional survey	Zeitschrift für Gastroenterologie	Germany	Inflammatory bowel disease	Investigate the actual use and perception of cannabis for IBD symptoms and its perceived influence on QoL, other medication, and possible therapeutic success	Questionnaire/ Survey	417					Consultation (pilot test)	No	Symptoms improvements	Side effects Ineffectiveness / Loss of interest Concerns	Not reported	General support / Comfort level of using medical cannabis	Search for information on cannabis	Effect on symptoms New side effects	Decison-making on own treatment	Perceived attitude of healthcare provider Whether they have discussed it	Not reported
22	Page	2003	Cannabis use as described by people with multiple sclerosis	The Canadian Journal of Neurological Sciences	Canada	Multiple sclerosis	Describe cannabis use by MS patients. Information on peoples’ beliefs, practices and experiences related to use were investigated	Questionnaire/ Survey	420					No	Yes	Discussion and information found	Access difficulties Side effects Ineffectiveness / Loss of interest Concerns	Concerns Information and research missing	Not reported	Not reported	Effect on symptoms	Not reported	Not reported	Not reported
23	Pergam	2017	Cannabis use among patients at a comprehensive cancer center in a state with legalized medicinal and recreational use	American Cancer Society	United States	Cancer	Determine the prevalence and methods of use among cancer patients, the perceived benefits, and the sources of information in a state with legalized cannabis	Questionnaire/ Survey	926					Collaboration (identify themes + review questionnaire)	Yes	Symptoms improvements In relation to the disease Improve quality of life	Not reported	Not reported	Not reported	Search for information on cannabis	Effect on disease's progression	Not reported	Not reported	Not reported
24	Piper	2017	Chronic pain patients' perspectives of medical cannabis	Pain	United States	Chronic pain	Provide an in-depth qualitative exploration of chronic pain patient perspectives on the strengths and limitations of medical cannabis	Questionnaire/ Survey	984					No	Yes	Symptoms improvements	Side effects	Not reported	Not reported	Not reported	Effect on quality of life Effect on symptoms New side effects Impact on lifestyle habits	Not reported	Perceived attitude of healthcare provider Whether they have discussed it Discussion characteristics of MC with healthcare provider	Comfort level discussing it with relatives Cannabis use by a relative
25	Potts	2020	Use and Perceptions of Opioids Versus Marijuana among Cancer Survivors	Journal of Cancer Education	United States	Cancer	Examine usemotives and perceived barriers in relation to opioid and marijuana use and interest in use among US adult cancer survivors	Questionnaire/ Survey	498					No	No	Symptoms improvements Improve quality of life In relation to the disease	Not reported	Concerns Personal choice Information and research missing	Not reported	Search for information on cannabis	Not reported	Not reported	Not reported	Not reported
26	Puteikis	2020	Use of cannabis and its products among patients in a tertiary epilepsy center: A cross-sectional survey	Epilepsy and Behavior	Lithuania	Epilepsy	Evaluate whether the topic of using cannabis as a treatment option for epilepsy is relevant among adult patients with the disorder and assess the possible determinant attitudes for having a history of cannabis consumption or being inclined to try it for medical purposes	Questionnaire/ Survey	250					No	No	Symptoms improvements	Not reported	Access difficulties Concerns Information and research missing	Comparison with other medications Concerns and risk perception	Knowledge on cannabis in general Knowledge of the effects of cannabis Search for information on cannabis	Not reported	Not reported	Not reported	Not reported
27	Reblin	2019	Medical Cannabis Use in Glioma Patients Treated at a Comprehensive Cancer Center in Florida	Journal of Palliative Medicine	United States	Cancer	Determine the prevalence of marijuana use, both through physician recommendation and self-medication, and evaluate its perceived risks and benefits in glioma patients	Questionnaire/ Survey	73					No	No	Symptoms improvements Improve quality of life In relation to the disease	Side effects Ineffectiveness / Loss of interest	Advice from relative/healthcare provider Concerns Information and research missing Personal choice	Not reported	Knowledge on cannabis in general	Effect on symptoms	Not reported	Perceived attitude of healthcare provider Discussion characteristics of MC with healthcare provider	Advice received or given
28	Schilling	2021	Cannabidiol as a treatment for chronic pain: A survey of patients' perspectives and attitudes	Journal of Pain Research	United States	Chronic pain	Learn about participants’ attitudes and views towards cannabis-based medicine (CBM) with a focus on perception of “CBD” and its potential role for pain management	Questionnaire/ Survey	253					No	Yes	Not reported	Not reported	Not reported	Concerns and risk perception General support / Comfort level of using medical cannabis Stereotypes	Knowledge on cannabis in general Search for information on cannabis	Effect on symptoms	Decison-making on own treatment	Perceived attitude of healthcare provider	Advice received or given Cannabis use by a relative
29	Stephen	2020	Use of medical marijuana in cystic fibrosis patients	BMC Complementary Medicine and Therapies	United States	Cystic Fibrosis	Assess the current usage rates and to discern the intake route and reasons for medical marijuana usage in a CF population.	Questionnaire/ Survey	193					No	No	Symptoms improvements Improve quality of life	Not reported	Not reported	Concerns and risk perception General support / Comfort level of using medical cannabis	Not reported	Effect on symptoms New side effects	Not reported	Not reported	Not reported
30	Stillman	2019	Attitudes toward and knowledge of medical cannabis among individuals with spinal cord injury	Spinal Cord Series and Cases	United States	Spinal Cord Injury (Pain)	Describe prevailing attitudes toward cannabis among people living with SCI	Questionnaire/ Survey	353					No	No	Not reported	Not reported	Not reported	Comparison with other medications Concerns and risk perception General support / Comfort level of using medical cannabis Stereotypes Conditions d'utilisation	Knowledge on cannabis in general Knowledge of the effects of cannabis	Not reported	Not reported	Not reported	Concerns about- or lived- stigma
31	Storr	2014	Cannabis use provides symptom relief in patients with inflammatory bowel disease but is associated with worse disease prognosis in patients with Crohn's disease	Inflammatory Bowel Diseases	Canada	Inflammatory bowel disease	Assess the extent and motives for Cannabis use in patients with IBD and the beneficial and adverse effects associated with self-administration of Cannabis	Questionnaire/ Survey	313					No	No	Discussion and information found Symptoms improvements In relation to other medications In relation to the disease	Not reported	Personal choice Advice from relative/healthcare provider Access difficulties Concerns Information and research missing	Comparison with other medications General support / Comfort level of using medical cannabis	Search for information on cannabis	Effects comparison with other medications Effect on symptoms New side effects	Decison-making on own treatment Participating in activities	Perceived attitude of healthcare provider Whether they have discussed it	Advice received or given
32	Tanco	2019	Attitudes and Beliefs about Medical Usefulness and Legalization of Marijuana among Cancer Patients in a Legalized and a Nonlegalized State	Journal of Palliative Medicine	United States	Cancer	Compare the attitudes and beliefs of cancer patients in a legalized (Arizona) versus nonlegalized state (Texas) regarding medical and recreational legalization and medical usefulness of marijuana	Questionnaire/ + physical and psychosocial assessments Survey	200					No	No	Symptoms improvements In relation to other medications	Not reported	Access difficulties Concerns Information and research missing	Comparison with other medications Concerns and risk perception Médias et compagnies pharmaceutiques General support / Comfort level of using medical cannabis	Search for information on cannabis	Effect on symptoms	Not reported	Not reported	Concerns about- or lived- stigma
33	Taneja	2021	The perceptions and beliefs of cannabis use among Canadian genitourinary cancer patients	Canadian Urological Association Journal	Canada	Cancer	Investigate the perceptions among genitourinary (GU) cancer patients regarding cannabis use as part of their care plans	Questionnaire/ Survey	52					No	Yes	Discussion and information found Symptoms improvements In relation to the disease	Not reported	Access difficulties	Condition d'utilisation Concerns and risk perception	Not reported	Effect on disease's progression Effect on quality of life Effect on symptoms New side effects	Not reported	Not reported	Level of support received
34	Victorson	2019	Exploring cancer survivors’ attitudes, perceptions, and concerns about using medical cannabis for symptom and side effect management: A qualitative focus group study	Complementary Therapies in Medicine	United States	Cancer	Gain a greater understanding of cancer survivors’ attitudes, perspectives, and concerns about medical cannabinoids (MCs) for cancer symptom and side effect management	Focus group	19					No	No	In relation to other medications	Not reported	Advice from relative/healthcare provider Access difficulties Concerns Information and research missing	Comparison with other medications Concerns and risk perception Médias et compagnies pharmaceutiques General support / Comfort level of using medical cannabis Stereotypes	Search for information on cannabis	Effect on quality of life New side effects Effect on symptoms	Decison-making on own treatment Positive feeling	Perceived attitude of healthcare provider Relationship with healthcare provider	Comfort level discussing it with relatives Concerns about- or lived- stigma Level of support received
35	Ware	2003	Cannabis use by persons living with HIV/AIDS: Patterns and prevalence of use	Journal of Cannabis Therapeutics	Canada	HIV	Determine the prevalence of use, reasons for use, amounts and methods used, and perceived effectiveness of cannabis and dronabinol among persons living with HIV/AIDS in Canada	Questionnaire/ Survey	160					Consultation (identify themes)	No	Symptoms improvements	Side effects	Not reported	Expected effects	Not reported	New side effects	Participating in activities	N/A	Not reported
36	Weinkle	2019	Exploring cannabis use by patients with multiple sclerosis in a state where cannabis is legal	Multiple Sclerosis and Related Disorders	United States	Multiple sclerosis	Evaluate cannabis use among PwMS at a large academic multiple sclerosis (MS) clinic, specifically: (1) prevalence, (2) products used (e.g., cannabidiol vs Δ9-tetrahydocannabinol), (3) symptom treatment, and (4) patient characteristics	Questionnaire/ Survey	251					Consultation (identify themes)	No	Not reported	Not reported	Not reported	Concerns and risk perception	Search for information on cannabis	Effect on symptoms	Not reported	Whether they have discussed it Relationship with healthcare provider	Not reported
37	Weiss	2021	A Coala-T-Cannabis Survey Study of breast cancer patients' use of cannabis before, during, and after treatment	Cancer	United States	Cancer	Characterize cannabis use among patients with breast cancer, including their reasons for and timing of use, their sources of cannabis information and products, their satisfaction with the information found, their perceptions of its safety, and their dialogue about cannabis with their physicians	Questionnaire/ Survey	612					Consultation (identify themes)	Yes	Symptoms improvements In relation to other medications	Not reported	Information and research missing	Comparison with other medications Concerns and risk perception General support / Comfort level of using medical cannabis Stereotypes	Knowledge on cannabis in general Search for information on cannabis	Effect on symptoms	Participating in activities	Perceived attitude of healthcare provider Discussion characteristics with healthcare provider Relationship with healthcare provider Whether they have discussed it	Comfort level discussing it with relatives Concerns about- or lived- stigma
38	Wilson	2021	Attitudes of Cancer Patients to Medicinal Cannabis Use: A Qualitative Study	Australian Social Work	Australia	Cancer	Explore attitudes, barriers, and concerns of cancer patients from one regional community in Australia to gain a better understanding of the experiences faced in using medicinal cannabis	Focus group + Interviews	16					No	No	Not reported	Not reported	Advice from relative/healthcare provider Access difficulties Concerns Information and research missing	Concerns and risk perception General support / Comfort level of using medical cannabis	Knowledge on cannabis in general Search for information on cannabis	Effect on symptoms	Not reported	Perceived attitude of healthcare provider Discussion characteristics with healthcare provider Relationship with healthcare provider	Comfort level discussing it with relatives Concerns about- or lived- stigma Level of support received
39	Zeiger	2021	Cannabis attitudes and patterns of use among followers of the Allergy & Asthma Network	Annals of Allergy, Asthma & Immunology	United States	Asthma	Determine the patterns of use and attitudes toward cannabis in patients with allergy/asthma	Questionnaire/ Survey	489					No	No	Not reported	Not reported	Not reported	Comparison with other medications Concerns and risk perception General support / Comfort level of using medical cannabis	Knowledge of the effects of cannabis	Effect on quality of life Effect on symptoms New side effects	Not reported	Discussion characteristics with healthcare provider Whether they have discussed it	Not reported
40	AminiLari	2022	perceptions of people living with chronic pain regarding benefits and concerns surrounding their use of cannabis for therapeutic purposes	American Academy of Pain Medecine	Canada	Noncancer chronic pain	We explored perceptions of people living with chronic pain regarding benefits and concerns surrounding their use of cannabis for therapeutic purposes.	Semi-structured interviews	13					Consultation (revision du guide )	Yes	In relation to other medications	Not reported	Acces difficulties Concerns (stigma)	Not reported	Not reported	Effect on quality of life Effect on symptoms New side effects	Not reported	Whether they have discussed it Perceived attitude of healthcare provider	Level of support received Cannabis use by a relative
41	Beauchesne	2022	Cannabis use in patients with Autosomal Recessive Spastic Ataxia of Charlevoix-Saguenay	Journal of Clinical Neuroscience	Canada	Autosomal recessive Spastic Ataxia of Charlevoix-Saguenay (ARSACS)	The aim of this study was to characterize the profile of cannabis use among patients with ARSACS. Secondarily, the frequency of ARSACS symptoms for which cannabis may provide relief will be assessed.	Phone interviews	50					No	No	Symptoms improvements Discussion and information found	Not reported	Not reported	Not reported	Not reported	Not reported	Not reported	Not reported	Not reported
42	Boehnke	2022	Cannabidiol Product Dosing and Decision-Making in a National Survey of Individuals with Fibromyalgia	Journal Of Pain	United States	Fibromyalgia	Investigate naturalistic decision making around CBD prod- uct choices, use patterns, and dosing.	Cross-sectionnal survey	878					No	No	Not reported	Not reported	Not reported	Not reported	Knowledge on cannabis in general	Effect on symptoms Effect on quality of life	Not reported	Not reported	Not reported
43	Erga	2022	Cannabis use in Parkinson’s disease—A nationwide online survey study	Acta neurologica scandinavica	Norway	Parkinson disease	Investigate the frequency of use, attitudes toward, and experiences with cannabis and cannabis-related products among people with Parkinson's disease (PwP) living in Norway.	Questionnaire/Survey	530					Consultation (feedback during the developement of the items)	No	Symptoms improvements Improve quality of life In relation to the disease	Access difficulties Side effects Ineffectiveness / Loss of interest Concerns	Not reported	Not reported	Not reported	Effect on disease's progression Effect on quality of life Effect on symptoms New side effects	Not reported	Barriers for seeking advices Whether they have discussed itPerceived attitude of healthcare provider Perceived attitude of healthcare provider	Not reported
44	Fader	2021	Assessment of Medical Cannabis in Patients With Osteoarthritis of the Thumb Basal Joint	American society of surgery of the hand	United States	Arthritis (thumb)	Explore utilization practices of medical cannabis for treatment of pain in patients with a diagnosis of thumb basal joint arthritis. Determine characteristics of cannabis users and nonusers. Investigate patient perceptions of the efficacy of medical cannabis in various formulations for the treatment of thumb arthritis pain.	Questionnaire/Survey	103					No	No	Symptoms improvements In relation to the disease Improve quality of life In relation to other medications	Not reported	Access difficulties Side effects Concerns Information and research missing	Not reported	Not reported	Effect on quality of life Effect on symptoms	Not reported	Not reported	Not reported
45	Fennell	2022	Young Adult Cannabis Users’ Perceptions of Cannabis Risks and Benefits by Chronic Pain Status	Substance use and misuse	United states	Chronic pain	Examination of perceived risks and benefits of cannabis use among young adult users by chronic pain status, and identified relationships among perceived risks and benefits, physical and mental health, and cannabis-related problems.	Questionnaire/Survey	176					No	No	Not reported	Not reported	Not reported	Concerns and risk perception, General support\comfort using medical cannabis	Not reported	Effect on symptoms , Effect on quality of life	Not reported	Not reported	Not reported
47	Han	2022	Cannabis Use among Patients with Alopecia Areata: A Cross-Sectional Survey Study	International Journal of Trichology	United States	Alopecia Areata	To characterize cannabis use among patients with AA.	Questionnaire/Survey	1087					No	Yes	Symptoms improvement, Discussion and information found	Concerns	Not reported	Not reported	Not reported	Effect on quality of life Effect on symptoms	Positive feeling	Not reported	Not reported
48	Hulaihel	2022	Medical cannabis and stigma: A qualitative study with patients living with chronic pain	Journal of Clinical Nursing	Israel	Chronic Pain	To explore the ways in which stigma is experienced, and what strategies are used to manage stigma among patients using medical cannabis to ease suffering from chronic pain.	Semi-structured Interviews	15					No	No	Discussion and information found, In relation with other medication, Improve quality of life	Not reported	Personal Choice, Concerns, Information and research missing	Concerns and risk perception, Comparison with other medications	Search for information on cannabis	Effect on quality of life, Effect on symptoms, New sides effects	Positive feeling (se sentent responsables et en contrôle)	N/A (plutôt dans raisons utilisation)	Comfort level discussing it with relatives Concerns about- or lived- stigma
49	Levin	2022	Attitudes Toward and Acceptability of Medical Marijuana Use Among Head and Neck Cancer Patients	The Annals of otology, rhinology, and laryngology	Canada	Cancer	This study aims to understand the attitudes toward marijuana in HNC patients.	Questionnaire/Survey	63					No	No	Advice from relative/healthcare provider, Symptoms improvements. Improve quality of life, In relation with other medication	Not reported	Personal Choice, Concerns, Access difficulties	Concerns and risk perception	Search for information on cannabis	Effect on symptoms. New side effects	Not reported	Discussion characteristics with healthcare provider	Advice received or given, Cannabis use by a relative, Comfort level discussing it with relatives
50	Manyau	2022	Perceptions and prevalence of marijuana use among cancer patients managed at an outpatient department in Zimbabwe: A brief report	Journal of Oncology Pharmacy Practice	Zimbabwe	Cancer	We sought to determine the prevalence, patterns of use and perceptions of medical marijuana among patients with cancer.	Questionnaire/Survey	50					Consultation (test pilote par 10 pts)	No	Not reported	Not reported	Not reported	Concerns and risk perception, General support/comfort level of using medical cannabis	Search for information on cannabis, Knowledge on cannabis in general, Knowledge of the effects of cannabis	Effect on symptoms. Effect on disease progression	Not reported	Perceived attitude of healthcare provider	Not reported
51	Sinclair	2022	"Should I Inhale?"-Perceptions, Barriers, and Drivers for Medicinal Cannabis Use amongst Australian Women with Primary Dysmenorrhoea: A Qualitative Study	International Journal of Environmental Research and Public Health	Australie	Primary Dysmenorrhea	This study sought to investigate the perceptions, barriers, and drivers associated with medicinal cannabis use among Australian women with primary dysmenorrhea.	Focus Group	26					No	Yes	In relation to other medications, symptoms improvement	Not reported	Concerns, Access difficulties, Information and research missing	Concerns and risk perception	Not reported	Effect on symptoms, New side effects,	Not reported	Perceived attitude of healthcare provider, Barriers for seeking advices	Comfort level discussing it with relatives Concerns about- or lived- stigma
52	Sukrueangkul	2021	Attitudes and Beliefs of Cancer Patients Demanding Medical Cannabis Use in the North of Thailand	Asian Pacific Journal of Cancer Prevention	North Thailand	Cancer	This study aimed to describe the attitudes and beliefs of cancer patients demanding MC use in northern Thailand.	Questionnaire/ Survey	565					No	No	In relation to other medications, In relation with the disease, Discussion and information found, Advice from relative/healthcare provider	Not reported	Not reported	General support / Comfort level of using medical cannabis, Comparison with other medications Concerns and risk perception	Not reported	Effect on symptoms, Effect on disease progression, Effect on quality of life	Not reported	Whether they have discussed it	Not reported
53	Sura	2022	Experience With Medical Marijuana for Cancer Patients in Palliative Setting	Cureus Journal of Medical Science	United States	Cancer	The goals of this study were to review the characteristics of patients who received medical marijuana under our ambulatory cancer palliative care program and to determine barriers to access and use of medical marijuana in this population.	Questionnaire/ Survey	184					No	No	Symptoms improvements, Relation with other medication	Not reported	Access difficulties, Personal Choice, Pas la capacité physique de consommer	Not reported	Not reported	Effect on symptoms, New side effects,	Not reported	Not reported	Not reported
54	Zhou	2022	Cancer patient’s attitudes of using medicinal cannabis for sleep	Journal of Psychosocial Oncology	United States	Cancer	We sought to address these important literature limitations by speaking with a diverse sample of cancer patients actively using MC. Specifically, we explored their experiences pertaining to MC use for sleep, without a priori hypotheses, with the hope that the informed assertions drawn from these analyses will lead to future investigations to understand the underlying meanings and mechanisms of th…	Semi-structured interviews	24					No	No	Symptoms improvement, In relation with the disease, Discussion and information found, Relation with other medication, Advice from relative/healthcare provider	Not reported	Not reported	Not reported	Knowledge of the effects of cannabis	Effect on symptoms, Effect on quality of life	Decison-making on own treatment	Not reported	Not reported
